# Supplementary material for: Transcriptomic Characterization of Genes Regulating the Stemness in Porcine Atrial Cardiomyocytes during Primary In Vitro Culture
Source: MDPI journal article supplement (doi:10.3390/genes14061223), 2023-06-04
Supplement: s1 [file s1]

**Table S1.** Symbols, changes in expression and adjusted p-values of 10 most deregulated genes in 7<sup>th</sup>, 15<sup>th</sup> and 30<sup>th</sup> day of cell culture derived from the fragment of right atrial wall.

| <b>Right atrial wall D7/D0</b>  |                                          |              |                     |
|---------------------------------|------------------------------------------|--------------|---------------------|
| <b>Gene symbol</b>              | <b>Gene name</b>                         | <b>Ratio</b> | <b>Adj. p-value</b> |
| <i>SFRP2</i>                    | secreted frizzled-related protein 2      | 91.25293     | 3.41E-06            |
| <i>PRRX1</i>                    | paired related homeobox 1                | 73.52752     | 2.28E-06            |
| <i>SNAI2</i>                    | snail family transcriptional repressor 2 | 10.69955     | 1.71E-05            |
| <i>RACGAP1</i>                  | Rac GTPase activating protein 1          | 8.056284     | 0.000174048         |
| <i>RUNX1</i>                    | RUNX family transcription factor 1       | 7.688494     | 0.004060851         |
| <i>TET1</i>                     | tet methylcytosine dioxygenase 1         | 7.264942     | 4.04E-05            |
| <i>PAX6</i>                     | paired box 6                             | 6.925844     | 1.44E-05            |
| <i>HIF1A</i>                    | hypoxia inducible factor 1 subunit alpha | 5.643026437  | 0.002096652         |
| <i>DOCK7</i>                    | dedicator of cytokinesis 7               | 5.601316092  | 2.50E-05            |
| <i>KLF10</i>                    | Kruppel-like factor 10                   | 5.483210429  | 0.002867812         |
| <b>Right atrial wall D15/D0</b> |                                          |              |                     |
| <b>Gene symbol</b>              | <b>Gene name</b>                         | <b>Ratio</b> | <b>Adj. p-value</b> |
| <i>PRRX1</i>                    | paired related homeobox 1                | 58.0526      | 2.66E-06            |
| <i>SFRP2</i>                    | secreted frizzled-related protein 2      | 45.91556     | 6.50E-06            |
| <i>TET1</i>                     | tet methylcytosine dioxygenase 1         | 8.274278     | 3.21E-05            |
| <i>RACGAP1</i>                  | Rac GTPase activating protein 1          | 7.824558     | 0.000196515         |
| <i>SNAI2</i>                    | snail family transcriptional repressor 2 | 6.952879     | 3.57E-05            |
| <i>DOCK7</i>                    | dedicator of cytokinesis 7               | 6.259523594  | 2.05E-05            |
| <i>KLF10</i>                    | Kruppel-like factor 10                   | 6.154489147  | 0.002262327         |

| <i>HIF1A</i>                    | hypoxia inducible factor 1 subunit alpha | 5.911749057  | 0.001975997         |
|---------------------------------|------------------------------------------|--------------|---------------------|
| <i>KITLG</i>                    | KIT ligand                               | 5.75209235   | 3.76E-05            |
| <i>ID4</i>                      | inhibitor of DNA binding 4, HLH protein  | 5.201814564  | 0.000160577         |
| <b>Right atrial wall D30/D0</b> |                                          |              |                     |
| <b>Gene symbol</b>              | <b>Gene name</b>                         | <b>Ratio</b> | <b>Adj. p-value</b> |
| <i>PRRX1</i>                    | paired related homeobox 1                | 55.30691     | 2.48E-06            |
| <i>SFRP2</i>                    | secreted frizzled-related protein 2      | 32.01501     | 9.50E-06            |
| <i>TBX3</i>                     | T-box transcription factor 3             | 12.71104     | 1.77E-05            |
| <i>FGF2</i>                     | fibroblast growth factor 2               | 9.279203494  | 7.86E-05            |
| <i>TET1</i>                     | tet methylcytosine dioxygenase 1         | 8.381566     | 3.28E-05            |
| <i>HIF1A</i>                    | hypoxia inducible factor 1 subunit alpha | 7.269599434  | 0.001293025         |
| <i>DOCK7</i>                    | dedicator of cytokinesis 7               | 7.108950161  | 1.68E-05            |
| <i>KITLG</i>                    | KIT ligand                               | 6.528684668  | 3.10E-05            |
| <i>RUNX1</i>                    | RUNX family transcription factor 1       | 5.432937     | 0.01060866          |
| <i>LIF</i>                      | LIF interleukin 6 family cytokine        | 5.186656838  | 0.000310085         |

**Supplementary Table S2.** Symbols, changes in expression and adjusted p-values of 10 most deregulated genes in 7<sup>th</sup>, 15<sup>th</sup> and 30<sup>th</sup> day of cell culture derived from the fragment of right atrial appendage.

| <b>Right atrial appendage D7/D0</b> |                                     |              |                     |
|-------------------------------------|-------------------------------------|--------------|---------------------|
| <b>Gene symbol</b>                  | <b>Gene name</b>                    | <b>Ratio</b> | <b>Adj. p-value</b> |
| <i>SFRP2</i>                        | secreted frizzled-related protein 2 | 61.19893155  | 1.81E-07            |
| <i>PRRX1</i>                        | paired related homeobox 1           | 24.27644802  | 9.54E-07            |
| <i>RACGAP1</i>                      | Rac GTPase activating protein 1     | 15.49744849  | 6.78E-06            |
| <i>FANCD2</i>                       | FA complementation group D2         | 9.391782881  | 3.69E-06            |

| <i>SNAI2</i>                         | snail family transcriptional repressor 2     | 8.575694836  | 1.52E-05            |
|--------------------------------------|----------------------------------------------|--------------|---------------------|
| <i>ASPM</i>                          | assembly factor for spindle microtubules     | 6.994969446  | 4.82E-06            |
| <i>HIF1A</i>                         | hypoxia inducible factor 1 subunit alpha     | 6.557233528  | 1.92E-05            |
| <i>KLF10</i>                         | Kruppel-like factor 10                       | 6.553449891  | 2.20E-06            |
| <i>DOCK7</i>                         | dedicator of cytokinesis 7                   | 5.783443744  | 2.49E-06            |
| <i>PAX6</i>                          | paired box 6                                 | 5.268159343  | 1.35E-05            |
| <b>Right atrial appendage D15/D0</b> |                                              |              |                     |
| <b>Gene symbol</b>                   | <b>Gene name</b>                             | <b>Ratio</b> | <b>Adj. p-value</b> |
| <i>SFRP2</i>                         | secreted frizzled-related protein 2          | 114.5021533  | 1.15E-07            |
| <i>PRRX1</i>                         | paired related homeobox 1                    | 33.31632816  | 6.94E-07            |
| <i>HIF1A</i>                         | hypoxia inducible factor 1 subunit alpha     | 7.752175853  | 1.58E-05            |
| <i>KLF10</i>                         | Kruppel-like factor 10                       | 7.474406056  | 1.85E-06            |
| <i>DOCK7</i>                         | dedicator of cytokinesis 7                   | 6.587462279  | 2.15E-06            |
| <i>RACGAP1</i>                       | Rac GTPase activating protein 1              | 4.803151211  | 0.000137476         |
| <i>TET1</i>                          | tet methylcytosine dioxygenase 1             | 4.529717852  | 8.53E-05            |
| <i>KIT</i>                           | KIT proto-oncogene, receptor tyrosine kinase | 4.091056982  | 2.47E-05            |
| <i>MED14</i>                         | mediator complex subunit 14                  | 3.985152941  | 0.000106386         |
| <i>TBX3</i>                          | T-box transcription factor 3                 | 3.714752736  | 1.51E-05            |
| <b>Right atrial appendage D30/D0</b> |                                              |              |                     |
| <b>Gene symbol</b>                   | <b>Gene name</b>                             | <b>Ratio</b> | <b>Adj. p-value</b> |
| <i>SFRP2</i>                         | secreted frizzled-related protein 2          | 110.9425022  | 1.11E-07            |
| <i>PRRX1</i>                         | paired related homeobox 1                    | 34.20995421  | 5.75E-07            |

|              |                                          |             |            |
|--------------|------------------------------------------|-------------|------------|
| <i>HIF1A</i> | hypoxia inducible factor 1 subunit alpha | 6.440413457 | 2.52E-05   |
| <i>DOCK7</i> | dedicator of cytokinesis 7               | 5.876689307 | 2.54E-06   |
| <i>KLF10</i> | Kruppel-like factor 10                   | 5.572430881 | 3.39E-06   |
| <i>TBX3</i>  | T-box transcription factor 3             | 5.538340048 | 4.18E-06   |
| <i>PAX6</i>  | paired box 6                             | 4.958727004 | 1.99E-05   |
| <i>TET1</i>  | tet methylcytosine dioxygenase 1         | 4.764415595 | 7.24E-05   |
| <i>WNT2B</i> | Wnt family member 2B                     | 4.417734575 | 0.00014699 |
| <i>NF1</i>   | neurofibromin 1                          | 3.729415734 | 8.77E-06   |
